# Supplementary material
Source: MDPI journal article supplement (https://www.mdpi.com/1424-2818/14/8/597)
Supplement: s1 [file s1]

Table of vegetation plots and plant traits of each species. Plots and species are arranged according to the main floristic gradient (DCA axis 1).

List of species in plot with estimation of their cover according to Braun-Blanquet scale

|                         |   |   |   |   |   |   |   |   |   |   |   |   |   |   |   |   |   |   |   |   |   |   |   |   |   |   |   |   |   |   |   |   |   |   |
|-------------------------|---|---|---|---|---|---|---|---|---|---|---|---|---|---|---|---|---|---|---|---|---|---|---|---|---|---|---|---|---|---|---|---|---|---|
| Veronica chamaedrys     | + | . | . | . | . | . | . | . | . | . | . | . | . | . | . | . | . | . | . | . | . | . | . | . | . | . | . | . | . | . | . | . | . |   |
| Prunus avium            | + | . | + | . | . | . | . | . | . | . | . | . | . | . | . | . | . | . | . | . | . | . | . | . | . | . | . | . | . | . | . | . | . |   |
| Acer platanoides        | . | + | . | . | . | . | . | . | . | . | . | . | . | . | . | . | . | . | . | . | . | . | . | . | . | . | . | . | . | . | . | . | . |   |
| Peucedanum schottii     | + | . | . | . | . | . | . | . | . | . | . | . | . | . | . | . | . | . | . | . | . | . | . | . | . | . | . | . | . | . | . | . | . |   |
| Veratrum nigrum         | . | . | . | . | + | . | . | . | . | . | . | . | . | + | . | . | + | . | . | . | + | . | . | . | . | . | . | . | . | . | . | . |   |   |
| Solidago virgaurea      | . | . | . | . | . | . | . | . | . | . | . | . | . | + | . | . | . | . | . | . | . | . | . | . | . | . | . | . | . | . | . | . | . |   |
| Anemone nemorosa        | 1 | + | + | + | + | . | . | . | 1 | . | . | . | . | 1 | 1 | . | . | 1 | . | . | . | 1 | . | . | . | . | + | . | . | . | . | . | . |   |
| Fragaria moschata       | + | . | + | . | . | . | . | . | . | . | . | . | . | . | . | . | . | . | . | . | . | . | . | . | . | . | + | . | . | . | . | . | . |   |
| Carpinus betulus        | + | . | . | . | . | . | + | . | . | . | . | . | . | . | . | . | . | . | . | . | . | . | . | + | . | + | . | . | . | . | . | . | . |   |
| Maianthemum bifolium    | . | . | . | . | . | . | . | . | . | . | . | . | . | . | . | . | . | . | . | . | . | . | + | . | . | . | . | . | . | . | . | . | . |   |
| Serratula tinctoria     | . | + | . | + | . | + | + | . | . | . | . | . | . | . | . | . | . | . | . | . | + | . | . | . | . | + | . | . | . | + | . | . | . |   |
| Lathyrus pratensis      | . | . | . | . | . | . | . | . | . | . | . | . | . | . | . | . | . | . | . | . | . | . | . | . | . | + | . | . | . | . | . | . | . |   |
| Dentaria bulbifera      | . | . | . | . | . | . | . | . | . | . | . | . | . | . | + | . | . | + | . | . | . | . | . | . | . | . | . | . | . | . | . | . | . |   |
| Salvia glutinosa        | 1 | 1 | 1 | 1 | + | . | . | . | + | . | + | . | . | 1 | . | . | . | . | . | . | . | . | . | . | + | . | + | . | . | . | . | . | 1 |   |
| Moehringia trinervia    | . | . | . | . | . | . | . | . | . | + | . | . | + | . | . | . | . | . | . | . | . | . | . | . | . | . | . | . | . | . | . | . | . |   |
| Lathyrus vernus         | . | 1 | . | + | + | + | . | + | + | . | + | + | . | + | + | . | + | . | + | . | + | . | . | . | . | + | . | + | + | + | . | + | . |   |
| Corylus avellana        | . | + | + | + | + | . | . | . | . | . | . | + | . | . | . | . | . | . | + | 1 | . | . | . | . | . | + | . | + | + | . | . | . | . |   |
| Primula vulgaris        | + | + | + | . | + | . | . | . | . | . | + | . | . | . | . | + | . | + | 1 | . | . | . | . | . | . | . | . | . | . | + | . | . | . |   |
| Dentaria enneaphyllos   | + | 2 | 2 | 2 | 2 | 1 | 3 | 2 | 2 | 2 | 1 | 2 | + | 1 | 2 | 2 | 3 | 2 | 1 | 2 | 3 | 1 | 2 | 2 | 2 | 1 | 3 | 1 | 3 | 2 | 2 | 2 | . |   |
| Galanthus nivalis       | . | . | . | . | . | + | + | . | . | + | . | + | + | . | . | . | + | . | . | + | . | . | + | . | . | . | + | . | + | . | + | . | . |   |
| Asarum europaeum        | . | . | . | . | . | 2 | . | + | . | 2 | 1 | 1 | 1 | . | . | . | 1 | . | . | + | 1 | . | 1 | . | . | . | . | . | + | 2 | 2 | . | 1 | + |
| Campanula trachelium    | . | 1 | . | . | 1 | + | . | + | + | . | + | + | . | + | + | . | + | + | . | 1 | . | . | . | + | . | . | + | . | . | . | + | . | . |   |
| Tilia cordata           | + | . | + | + | . | . | . | . | + | + | + | . | + | + | 1 | + | . | 1 | + | . | . | . | . | + | + | . | + | + | . | . | . | . | + |   |
| Convallaria majalis     | + | 2 | . | 3 | . | 2 | . | + | . | + | 2 | + | . | + | . | . | . | . | . | . | . | . | + | . | + | 1 | . | 3 | . | . | + | + | 2 | 1 |
| Viola reichenbachiana   | + | + | + | . | + | . | . | . | . | . | + | . | . | . | . | . | . | . | . | . | . | . | . | + | . | + | . | + | . | . | . | + | . | . |
| Hieracium murorum       | . | . | . | . | . | . | . | . | . | . | . | . | . | . | . | . | . | . | . | . | . | . | . | . | . | . | . | . | . | . | . | . | . | . |
| Quercus petraea         | . | + | . | . | . | . | . | . | . | . | + | . | . | . | + | + | . | 1 | + | . | . | + | 1 | . | . | . | + | + | . | . | . | + | + |   |
| Carex digitata          | 1 | + | + | + | + | . | . | . | + | + | . | . | 1 | + | + | . | + | . | + | + | . | . | 1 | 2 | . | 1 | 1 | + | . | + | 1 | . | . |   |
| Cirsium erisithales     | . | . | . | . | . | . | . | . | . | . | . | . | . | . | . | . | . | . | . | . | . | . | . | . | . | . | . | . | . | . | . | . | . | . |
| Galeobdolon montanum    | . | . | . | 1 | 2 | . | . | . | 1 | 2 | . | 2 | 3 | 2 | 1 | . | + | 1 | . | . | 1 | 1 | . | . | . | . | + | + | + | . | . | + | + |   |
| Galium laevigatum       | . | . | . | . | . | . | . | . | . | . | . | . | . | . | . | + | . | . | . | . | . | . | . | . | . | . | . | . | . | . | . | . | . | . |
| Viola mirabilis         | . | . | . | . | . | . | . | . | . | . | . | . | . | . | . | . | . | . | . | . | . | . | . | . | . | . | . | . | . | . | . | . | . | . |
| Polygonatum multiflorum | . | . | . | . | . | . | . | . | . | . | . | . | . | . | . | 2 | . | . | . | . | . | . | . | . | . | . | . | . | . | . | . | . | . | . |
| Symphytum tuberosum     | + | + | + | . | . | + | . | . | + | . | + | . | . | . | 1 | . | . | + | . | + | . | . | . | . | + | . | . | . | + | . | + | . | . |   |
| Hepatica nobilis        | . | . | . | . | . | + | . | . | . | + | . | + | 2 | . | . | . | + | . | . | 1 | 1 | . | . | . | 1 | 2 | . | . | + | + | + | . | . |   |
| Mycelis muralis         | + | . | + | . | . | . | . | . | . | . | . | . | . | . | . | . | . | . | . | . | . | . | . | . | . | . | . | . | . | . | . | . | . | . |

|                        |   |   |   |   |   |   |   |   |   |   |   |   |   |   |   |   |   |   |   |   |   |   |   |   |   |   |   |   |   |   |   |   |   |   |   |   |   |   |   |   |   |   |   |   |   |   |   |   |   |   |   |   |   |   |   |   |   |   |   |   |   |   |   |   |   |   |   |   |   |   |   |   |   |   |   |   |   |   |   |   |   |   |   |   |   |   |   |   |   |   |   |   |   |   |   |   |   |   |   |   |   |   |   |   |   |   |   |   |   |   |   |   |   |   |   |   |   |   |   |   |   |   |   |   |   |   |   |   |   |   |   |   |   |   |   |   |   |   |   |   |   |   |   |   |   |   |   |   |   |   |   |   |   |   |   |   |   |   |   |   |   |   |   |   |   |   |   |   |   |   |   |   |   |   |   |   |   |   |   |   |   |   |   |   |   |   |   |   |   |   |   |   |   |   |   |   |   |   |   |   |   |   |   |   |   |   |   |   |   |   |   |   |   |   |   |   |   |   |   |   |   |   |   |   |   |   |   |   |   |   |   |   |   |   |   |   |   |   |   |   |   |   |   |   |   |   |   |   |   |   |   |   |   |   |   |   |   |   |   |   |   |   |   |   |   |   |   |   |   |   |   |   |   |   |   |   |   |   |   |   |   |   |   |   |   |   |   |   |   |   |   |   |   |   |   |   |   |   |   |   |   |   |   |   |   |   |   |   |   |   |   |   |   |   |   |   |   |   |   |   |   |   |   |   |   |   |   |   |   |   |   |   |   |   |   |   |   |   |   |   |   |   |   |   |   |   |   |   |   |   |   |   |   |   |   |   |   |   |   |   |   |   |   |   |   |   |   |   |   |   |   |   |   |   |   |   |   |   |   |   |   |   |   |   |   |   |   |   |   |   |   |   |   |   |   |   |   |   |   |   |   |   |   |   |   |   |   |   |   |   |   |   |   |   |   |   |   |   |   |   |   |   |   |   |   |   |   |   |   |   |   |   |   |   |   |   |   |   |   |   |   |   |   |   |   |   |   |   |   |   |   |   |   |   |   |   |   |   |   |   |   |   |   |   |   |   |   |   |   |   |   |   |   |   |   |   |   |   |   |   |   |   |   |   |   |   |   |   |   |   |   |   |   |   |   |   |   |   |   |   |   |   |   |   |   |   |   |   |   |   |   |   |   |   |   |   |   |   |   |   |   |   |   |   |   |   |   |   |   |   |   |   |   |   |   |   |   |   |   |   |   |   |   |   |   |   |   |   |   |   |   |   |   |   |   |   |   |   |   |   |   |   |   |   |   |   |   |   |   |   |   |   |   |   |   |   |   |   |   |   |   |   |   |   |   |   |   |   |   |   |   |   |   |   |   |   |   |   |   |   |   |   |   |   |   |   |   |   |   |   |   |   |   |   |   |   |   |   |   |   |   |   |   |   |   |   |   |   |   |   |   |   |   |   |   |   |   |   |   |   |   |   |   |   |   |   |   |   |   |   |   |   |   |   |   |   |   |   |   |   |   |   |   |   |   |   |   |   |   |   |   |   |   |   |   |   |   |   |   |   |   |   |   |   |   |   |   |   |   |   |   |   |   |   |   |   |   |   |   |   |   |   |   |   |   |   |   |   |   |   |   |   |   |   |   |   |   |   |   |   |   |   |   |   |   |   |   |   |   |   |   |   |   |   |   |   |   |   |   |   |   |   |   |   |   |   |   |   |   |   |   |   |   |   |   |   |   |   |   |   |   |   |   |   |   |   |   |   |   |   |   |   |   |   |   |   |   |   |   |   |   |   |   |   |   |   |   |   |   |   |   |   |   |   |   |   |   |   |   |   |   |   |   |   |   |   |   |   |   |   |   |   |   |   |   |   |   |   |   |   |   |   |   |   |   |   |   |   |   |   |   |   |   |   |   |   |   |   |   |   |   |   |   |   |   |   |   |   |   |   |   |   |   |   |   |   |   |   |   |   |   |   |   |   |   |   |   |   |   |   |   |   |   |   |   |   |   |   |   |   |   |   |   |   |   |   |   |   |   |   |   |   |   |   |   |   |   |   |   |   |   |   |   |   |   |   |   |   |   |   |   |   |   |   |   |   |   |   |   |   |   |   |   |   |   |   |   |   |   |   |   |   |   |   |   |   |   |   |   |   |   |   |   |   |   |   |   |   |   |   |   |   |   |   |   |   |   |   |   |   |   |   |   |   |   |   |   |   |   |   |   |   |   |   |   |   |   |   |   |   |   |   |   |   |   |   |   |   |   |   |   |   |   |   |   |   |   |   |   |   |   |   |   |   |   |   |   |   |   |   |   |   |   |   |   |   |   |   |   |   |   |   |   |   |   |   |   |   |   |   |   |   |   |   |   |   |   |   |   |   |   |   |   |   |   |   |   |   |   |   |   |   |   |   |   |   |   |   |   |   |   |   |   |   |   |   |   |   |   |   |   |   |   |   |   |   |   |   |   |   |   |   |   |   |   |   |   |   |   |   |   |   |   |   |   |   |   |   |   |   |   |   |   |   |   |   |   |   |   |   |   |   |   |   |   |   |   |   |   |   |   |   |   |   |   |   |   |   |   |   |   |   |   |   |   |   |   |   |   |   |   |   |   |   |   |   |   |   |   |   |   |   |   |   |   |   |   |   |   |   |   |   |   |   |   |   |   |   |   |   |   |   |   |   |   |   |   |   |   |   |   |   |   |   |   |   |   |   |   |   |   |   |   |   |   |   |   |   |   |   |   |   |   |   |   |   |   |   |   |   |   |   |   |   |   |   |   |   |   |   |   |   |   |   |   |   |
|------------------------|---|---|---|---|---|---|---|---|---|---|---|---|---|---|---|---|---|---|---|---|---|---|---|---|---|---|---|---|---|---|---|---|---|---|---|---|---|---|---|---|---|---|---|---|---|---|---|---|---|---|---|---|---|---|---|---|---|---|---|---|---|---|---|---|---|---|---|---|---|---|---|---|---|---|---|---|---|---|---|---|---|---|---|---|---|---|---|---|---|---|---|---|---|---|---|---|---|---|---|---|---|---|---|---|---|---|---|---|---|---|---|---|---|---|---|---|---|---|---|---|---|---|---|---|---|---|---|---|---|---|---|---|---|---|---|---|---|---|---|---|---|---|---|---|---|---|---|---|---|---|---|---|---|---|---|---|---|---|---|---|---|---|---|---|---|---|---|---|---|---|---|---|---|---|---|---|---|---|---|---|---|---|---|---|---|---|---|---|---|---|---|---|---|---|---|---|---|---|---|---|---|---|---|---|---|---|---|---|---|---|---|---|---|---|---|---|---|---|---|---|---|---|---|---|---|---|---|---|---|---|---|---|---|---|---|---|---|---|---|---|---|---|---|---|---|---|---|---|---|---|---|---|---|---|---|---|---|---|---|---|---|---|---|---|---|---|---|---|---|---|---|---|---|---|---|---|---|---|---|---|---|---|---|---|---|---|---|---|---|---|---|---|---|---|---|---|---|---|---|---|---|---|---|---|---|---|---|---|---|---|---|---|---|---|---|---|---|---|---|---|---|---|---|---|---|---|---|---|---|---|---|---|---|---|---|---|---|---|---|---|---|---|---|---|---|---|---|---|---|---|---|---|---|---|---|---|---|---|---|---|---|---|---|---|---|---|---|---|---|---|---|---|---|---|---|---|---|---|---|---|---|---|---|---|---|---|---|---|---|---|---|---|---|---|---|---|---|---|---|---|---|---|---|---|---|---|---|---|---|---|---|---|---|---|---|---|---|---|---|---|---|---|---|---|---|---|---|---|---|---|---|---|---|---|---|---|---|---|---|---|---|---|---|---|---|---|---|---|---|---|---|---|---|---|---|---|---|---|---|---|---|---|---|---|---|---|---|---|---|---|---|---|---|---|---|---|---|---|---|---|---|---|---|---|---|---|---|---|---|---|---|---|---|---|---|---|---|---|---|---|---|---|---|---|---|---|---|---|---|---|---|---|---|---|---|---|---|---|---|---|---|---|---|---|---|---|---|---|---|---|---|---|---|---|---|---|---|---|---|---|---|---|---|---|---|---|---|---|---|---|---|---|---|---|---|---|---|---|---|---|---|---|---|---|---|---|---|---|---|---|---|---|---|---|---|---|---|---|---|---|---|---|---|---|---|---|---|---|---|---|---|---|---|---|---|---|---|---|---|---|---|---|---|---|---|---|---|---|---|---|---|---|---|---|---|---|---|---|---|---|---|---|---|---|---|---|---|---|---|---|---|---|---|---|---|---|---|---|---|---|---|---|---|---|---|---|---|---|---|---|---|---|---|---|---|---|---|---|---|---|---|---|---|---|---|---|---|---|---|---|---|---|---|---|---|---|---|---|---|---|---|---|---|---|---|---|---|---|---|---|---|---|---|---|---|---|---|---|---|---|---|---|---|---|---|---|---|---|---|---|---|---|---|---|---|---|---|---|---|---|---|---|---|---|---|---|---|---|---|---|---|---|---|---|---|---|---|---|---|---|---|---|---|---|---|---|---|---|---|---|---|---|---|---|---|---|---|---|---|---|---|---|---|---|---|---|---|---|---|---|---|---|---|---|---|---|---|---|---|---|---|---|---|---|---|---|---|---|---|---|---|---|---|---|---|---|---|---|---|---|---|---|---|---|---|---|---|---|---|---|---|---|---|---|---|---|---|---|---|---|---|---|---|---|---|---|---|---|---|---|---|---|---|---|---|---|---|---|---|---|---|---|---|---|---|---|---|---|---|---|---|---|---|---|---|---|---|---|---|---|---|---|---|---|---|---|---|---|---|---|---|---|---|---|---|---|---|---|---|---|---|---|---|---|---|---|---|---|---|---|---|---|---|---|---|---|---|---|---|---|---|---|---|---|---|---|---|---|---|---|---|---|---|---|---|---|---|---|---|---|---|---|---|---|---|---|---|---|---|---|---|---|---|---|---|---|---|---|---|---|---|---|---|---|---|---|---|---|---|---|---|---|---|---|---|---|---|---|---|---|---|---|---|---|---|---|---|---|---|---|---|---|---|---|---|---|---|---|---|---|---|---|---|---|---|---|---|---|---|---|---|---|---|---|---|---|---|---|---|---|---|---|---|---|---|---|---|---|---|---|---|---|---|---|---|---|---|---|---|---|---|---|---|---|---|---|---|---|---|---|---|---|---|---|---|---|---|---|---|---|---|---|---|---|---|---|---|---|---|---|---|---|---|---|---|---|---|---|---|---|---|---|---|---|---|---|---|---|---|---|---|---|---|---|---|---|---|---|---|---|---|---|---|---|---|---|---|---|---|---|---|---|---|---|---|---|---|---|---|---|---|---|---|---|---|---|---|---|---|---|---|---|---|---|---|---|---|---|---|---|---|---|---|---|---|---|---|---|---|---|---|---|---|---|---|---|---|---|---|---|---|---|---|---|---|---|---|---|---|---|---|---|---|---|---|---|---|---|---|---|---|---|---|---|---|---|---|---|---|---|---|---|---|---|---|---|---|---|---|---|---|---|---|---|---|---|---|---|---|---|---|---|---|---|---|---|---|---|---|---|---|---|---|---|---|---|---|---|---|---|---|---|---|---|---|---|---|---|---|---|---|---|---|---|---|---|
| Campanula persicifolia | . | . | . | . | . | . | . | . | . | . | . | . | . | . | . | . | . | . | . | . | . | . | . | . | . | . | . | . | . | . | . | . | . | . | . | . | . | . | . | . | . | . | . | . | . | . | . | . | . | . | . | . | . | . | . | . | . | . | . | . | . | . | . | . | . | . | . | . | . | . | . | . | . | . | . | . | . | . | . | . | . | . | . | . | . | . | . | . | . | . | . | . | . | . | . | . | . | . | . | . | . | . | . | . | . | . | . | . | . | . | . | . | . | . | . | . | . | . | . | . | . | . | . | . | . | . | . | . | . | . | . | . | . | . | . | . | . | . | . | . | . | . | . | . | . | . | . | . | . | . | . | . | . | . | . | . | . | . | . | . | . | . | . | . | . | . | . | . | . | . | . | . | . | . | . | . | . | . | . | . | . | . | . | . | . | . | . | . | . | . | . | . | . | . | . | . | . | . | . | . | . | . | . | . | . | . | . | . | . | . | . | . | . | . | . | . | . | . | . | . | . | . | . | . | . | . | . | . | . | . | . | . | . | . | . | . | . | . | . | . | . | . | . | . | . | . | . | . | . | . | . | . | . | . | . | . | . | . | . | . | . | . | . | . | . | . | . | . | . | . | . | . | . | . | . | . | . | . | . | . | . | . | . | . | . | . | . | . | . | . | . | . | . | . | . | . | . | . | . | . | . | . | . | . | . | . | . | . | . | . | . | . | . | . | . | . | . | . | . | . | . | . | . | . | . | . | . | . | . | . | . | . | . | . | . | . | . | . | . | . | . | . | . | . | . | . | . | . | . | . | . | . | . | . | . | . | . | . | . | . | . | . | . | . | . | . | . | . | . | . | . | . | . | . | . | . | . | . | . | . | . | . | . | . | . | . | . | . | . | . | . | . | . | . | . | . | . | . | . | . | . | . | . | . | . | . | . | . | . | . | . | . | . | . | . | . | . | . | . | . | . | . | . | . | . | . | . | . | . | . | . | . | . | . | . | . | . | . | . | . | . | . | . | . | . | . | . | . | . | . | . | . | . | . | . | . | . | . | . | . | . | . | . | . | . | . | . | . | . | . | . | . | . | . | . | . | . | . | . | . | . | . | . | . | . | . | . | . | . | . | . | . | . | . | . | . | . | . | . | . | . | . | . | . | . | . | . | . | . | . | . | . | . | . | . | . | . | . | . | . | . | . | . | . | . | . | . | . | . | . | . | . | . | . | . | . | . | . | . | . | . | . | . | . | . | . | . | . | . | . | . | . | . | . | . | . | . | . | . | . | . | . | . | . | . | . | . | . | . | . | . | . | . | . | . | . | . | . | . | . | . | . | . | . | . | . | . | . | . | . | . | . | . | . | . | . | . | . | . | . | . | . | . | . | . | . | . | . | . | . | . | . | . | . | . | . | . | . | . | . | . | . | . | . | . | . | . | . | . | . | . | . | . | . | . | . | . | . | . | . | . | . | . | . | . | . | . | . | . | . | . | . | . | . | . | . | . | . | . | . | . | . | . | . | . | . | . | . | . | . | . | . | . | . | . | . | . | . | . | . | . | . | . | . | . | . | . | . | . | . | . | . | . | . | . | . | . | . | . | . | . | . | . | . | . | . | . | . | . | . | . | . | . | . | . | . | . | . | . | . | . | . | . | . | . | . | . | . | . | . | . | . | . | . | . | . | . | . | . | . | . | . | . | . | . | . | . | . | . | . | . | . | . | . | . | . | . | . | . | . | . | . | . | . | . | . | . | . | . | . | . | . | . | . | . | . | . | . | . | . | . | . | . | . | . | . | . | . | . | . | . | . | . | . | . | . | . | . | . | . | . | . | . | . | . | . | . | . | . | . | . | . | . | . | . | . | . | . | . | . | . | . | . | . | . | . | . | . | . | . | . | . | . | . | . | . | . | . | . | . | . | . | . | . | . | . | . | . | . | . | . | . | . | . | . | . | . | . | . | . | . | . | . | . | . | . | . | . | . | . | . | . | . | . | . | . | . | . | . | . | . | . | . | . | . | . | . | . | . | . | . | . | . | . | . | . | . | . | . | . | . | . | . | . | . | . | . | . | . | . | . | . | . | . | . | . | . | . | . | . | . | . | . | . | . | . | . | . | . | . | . | . | . | . | . | . | . | . | . | . | . | . | . | . | . | . | . | . | . | . | . | . | . | . | . | . | . | . | . | . | . | . | . | . | . | . | . | . | . | . | . | . | . | . | . | . | . | . | . | . | . | . | . | . | . | . | . | . | . | . | . | . | . | . | . | . | . | . | . | . | . | . | . | . | . | . | . | . | . | . | . | . | . | . | . | . | . | . | . | . | . | . | . | . | . | . | . | . | . | . | . | . | . | . | . | . | . | . | . | . | . | . | . | . | . | . | . | . | . | . | . | . | . | . | . | . | . | . | . | . | . | . | . | . | . | . | . | . | . | . | . | . | . | . | . | . | . | . | . | . | . | . | . | . | . | . | . | . | . | . | . | . | . | . | . | . | . | . | . | . | . | . | . | . | . | . | . | . | . | . | . | . | . | . | . | . | . | . | . | . | . | . | . | . | . | . | . | . | . | . | . | . | . | . | . | . | . | . | . | . | . | . | . | . | . | . | . | . | . | . | . | . | . | . | . | . | . | . | . | . | . | . | . | . | . | . | . | . | . | . | . | . | . | . | . | . | . | . | . | . | . | . | . | . | . | . | . | . | . | . | . | . | . | . | . | . | . | . | . | . | . | . | . | . | . | . | . | . | . | . | . | . | . | . | . | . | . | . | . | . | . | . | . | . | . | . |
|------------------------|---|---|---|---|---|---|---|---|---|---|---|---|---|---|---|---|---|---|---|---|---|---|---|---|---|---|---|---|---|---|---|---|---|---|---|---|---|---|---|---|---|---|---|---|---|---|---|---|---|---|---|---|---|---|---|---|---|---|---|---|---|---|---|---|---|---|---|---|---|---|---|---|---|---|---|---|---|---|---|---|---|---|---|---|---|---|---|---|---|---|---|---|---|---|---|---|---|---|---|---|---|---|---|---|---|---|---|---|---|---|---|---|---|---|---|---|---|---|---|---|---|---|---|---|---|---|---|---|---|---|---|---|---|---|---|---|---|---|---|---|---|---|---|---|---|---|---|---|---|---|---|---|---|---|---|---|---|---|---|---|---|---|---|---|---|---|---|---|---|---|---|---|---|---|---|---|---|---|---|---|---|---|---|---|---|---|---|---|---|---|---|---|---|---|---|---|---|---|---|---|---|---|---|---|---|---|---|---|---|---|---|---|---|---|---|---|---|---|---|---|---|---|---|---|---|---|---|---|---|---|---|---|---|---|---|---|---|---|---|---|---|---|---|---|---|---|---|---|---|---|---|---|---|---|---|---|---|---|---|---|---|---|---|---|---|---|---|---|---|---|---|---|---|---|---|---|---|---|---|---|---|---|---|---|---|---|---|---|---|---|---|---|---|---|---|---|---|---|---|---|---|---|---|---|---|---|---|---|---|---|---|---|---|---|---|---|---|---|---|---|---|---|---|---|---|---|---|---|---|---|---|---|---|---|---|---|---|---|---|---|---|---|---|---|---|---|---|---|---|---|---|---|---|---|---|---|---|---|---|---|---|---|---|---|---|---|---|---|---|---|---|---|---|---|---|---|---|---|---|---|---|---|---|---|---|---|---|---|---|---|---|---|---|---|---|---|---|---|---|---|---|---|---|---|---|---|---|---|---|---|---|---|---|---|---|---|---|---|---|---|---|---|---|---|---|---|---|---|---|---|---|---|---|---|---|---|---|---|---|---|---|---|---|---|---|---|---|---|---|---|---|---|---|---|---|---|---|---|---|---|---|---|---|---|---|---|---|---|---|---|---|---|---|---|---|---|---|---|---|---|---|---|---|---|---|---|---|---|---|---|---|---|---|---|---|---|---|---|---|---|---|---|---|---|---|---|---|---|---|---|---|---|---|---|---|---|---|---|---|---|---|---|---|---|---|---|---|---|---|---|---|---|---|---|---|---|---|---|---|---|---|---|---|---|---|---|---|---|---|---|---|---|---|---|---|---|---|---|---|---|---|---|---|---|---|---|---|---|---|---|---|---|---|---|---|---|---|---|---|---|---|---|---|---|---|---|---|---|---|---|---|---|---|---|---|---|---|---|---|---|---|---|---|---|---|---|---|---|---|---|---|---|---|---|---|---|---|---|---|---|---|---|---|---|---|---|---|---|---|---|---|---|---|---|---|---|---|---|---|---|---|---|---|---|---|---|---|---|---|---|---|---|---|---|---|---|---|---|---|---|---|---|---|---|---|---|---|---|---|---|---|---|---|---|---|---|---|---|---|---|---|---|---|---|---|---|---|---|---|---|---|---|---|---|---|---|---|---|---|---|---|---|---|---|---|---|---|---|---|---|---|---|---|---|---|---|---|---|---|---|---|---|---|---|---|---|---|---|---|---|---|---|---|---|---|---|---|---|---|---|---|---|---|---|---|---|---|---|---|---|---|---|---|---|---|---|---|---|---|---|---|---|---|---|---|---|---|---|---|---|---|---|---|---|---|---|---|---|---|---|---|---|---|---|---|---|---|---|---|---|---|---|---|---|---|---|---|---|---|---|---|---|---|---|---|---|---|---|---|---|---|---|---|---|---|---|---|---|---|---|---|---|---|---|---|---|---|---|---|---|---|---|---|---|---|---|---|---|---|---|---|---|---|---|---|---|---|---|---|---|---|---|---|---|---|---|---|---|---|---|---|---|---|---|---|---|---|---|---|---|---|---|---|---|---|---|---|---|---|---|---|---|---|---|---|---|---|---|---|---|---|---|---|---|---|---|---|---|---|---|---|---|---|---|---|---|---|---|---|---|---|---|---|---|---|---|---|---|---|---|---|---|---|---|---|---|---|---|---|---|---|---|---|---|---|---|---|---|---|---|---|---|---|---|---|---|---|---|---|---|---|---|---|---|---|---|---|---|---|---|---|---|---|---|---|---|---|---|---|---|---|---|---|---|---|---|---|---|---|---|---|---|---|---|---|---|---|---|---|---|---|---|---|---|---|---|---|---|---|---|---|---|---|---|---|---|---|---|---|---|---|---|---|---|---|---|---|---|---|---|---|---|---|---|---|---|---|---|---|---|---|---|---|---|---|---|---|---|---|---|---|---|---|---|---|---|---|---|---|---|---|---|---|---|---|---|---|---|---|---|---|---|---|---|---|---|---|---|---|---|---|---|---|---|---|---|---|---|---|---|---|---|---|---|---|---|---|---|---|---|---|---|---|---|---|---|---|---|---|---|---|---|---|---|---|---|---|---|---|---|---|---|---|---|---|---|---|---|---|---|---|---|---|---|---|---|---|---|---|---|---|---|---|---|---|---|---|---|---|---|---|---|---|---|---|---|---|---|---|---|---|---|---|---|---|---|---|---|---|---|---|---|---|---|---|---|---|---|---|---|---|---|---|---|---|---|---|---|---|---|---|---|---|---|---|---|---|---|---|---|---|---|---|---|---|---|---|---|---|---|---|---|---|---|---|---|---|---|---|---|---|---|---|---|---|---|---|---|---|---|---|---|---|---|---|---|

[illegible]

Localities in Živi muzej Krasa (Sežana): A0: 45.69616, 13.87045; A1: 45.68776, 13.86891; A2: 45.69353, 13.86007; A3: 45.69307, 13.86856; A4: 45.68995, 13.8669; A5: 45.6866, 13.86726; A6: 45.68616, 13.86818; A7: 45.67394, 13.87003; A

Legend. Life forms: CH - chamaephyte, G – geophyte, H – hemicryptophyte, NP – nanophanerophyte, P – phanerophyte; architecture: BULB – bulbous, CAESP – caespitose, LIAN – liane, REPT – crawling, RHIZ – rhizomatous, ROS – rosulate,

|    |    |    |    |    |    |    |    |    |    |    |    |    |    |    |    |    |    |    |    |    |    |    |    |    |    |    |    |    |    |    |    |    |    |    |    |    |    |    |    |    |    |    |    |    |    |
|----|----|----|----|----|----|----|----|----|----|----|----|----|----|----|----|----|----|----|----|----|----|----|----|----|----|----|----|----|----|----|----|----|----|----|----|----|----|----|----|----|----|----|----|----|----|
| 39 | 40 | 41 | 42 | 43 | 44 | 45 | 46 | 47 | 48 | 49 | 50 | 51 | 52 | 53 | 54 | 55 | 56 | 57 | 58 | 59 | 60 | 61 | 62 | 63 | 64 | 65 | 66 | 67 | 68 | 69 | 70 | 71 | 72 | 73 | 74 | 75 | 76 | 77 | 78 | 79 | 80 | 81 | 82 | 83 | 84 |
| 20 | 12 | 12 | 11 | 11 | 2  | 29 | 2  | 12 | 12 | 29 | 29 | 22 | 2  | 20 | 29 | 18 | 1  | 22 | 1  | 2  | 12 | 1  | 29 | 29 | 12 | 12 | 29 | 20 | 11 | 18 | 1  | 2  | 18 | 1  | 2  | 29 | 12 | 20 | 22 | 29 | 2  | 2  | 20 | 22 | 1  |
| 5  | 6  | 6  | 6  | 6  | 6  | 5  | 6  | 6  | 6  | 5  | 5  | 5  | 6  | 5  | 5  | 5  | 6  | 5  | 6  | 6  | 6  | 5  | 5  | 6  | 6  | 6  | 5  | 5  | 6  | 5  | 6  | 6  | 5  | 6  | 5  | 6  | 5  | 5  | 5  | 6  | 6  | 5  | 5  | 6  |    |
| 20 | 20 | 20 | 20 | 20 | 20 | 20 | 20 | 20 | 20 | 20 | 20 | 20 | 20 | 20 | 20 | 20 | 20 | 20 | 20 | 20 | 20 | 20 | 20 | 20 | 20 | 20 | 20 | 20 | 20 | 20 | 20 | 20 | 20 | 20 | 20 | 20 | 20 | 20 | 20 | 20 | 20 | 20 | 20 | 20 |    |
| A0 | A8 | A8 | A7 | A7 | A9 | A6 | A9 | A8 | A8 | A6 | A6 | A5 | A7 | A0 | A6 | A3 | A9 | A5 | A9 | A9 | A8 | A9 | A6 | A6 | A8 | A8 | A6 | A0 | A7 | A3 | A9 | A7 | A3 | A9 | A7 | A6 | A8 | A0 | A5 | A6 | A7 | A9 | A0 | A5 | A9 |
| 36 | 14 | 26 | 22 | 20 | 30 | 28 | 32 | 36 | 32 | 30 | 28 | 20 | 24 | 26 | 32 | 22 | 50 | 16 | 24 | 26 | 16 | 22 | 30 | 24 | 22 | 28 | 22 | 24 | 24 | 20 | 30 | 26 | 10 | 28 | 20 | 18 | 32 | 26 | 10 | 16 | 28 | 14 | 22 | 18 | 26 |
| S  | N  | N  | N  | N  | S  | S  | S  | S  | S  | N  | N  | S  | S  | N  | N  | N  | N  | N  | N  | S  | N  | N  | S  | N  | N  | N  | N  | N  | N  | N  | N  | S  | N  | N  | S  | N  | N  | S  | N  | N  | S  | S  | N  | S  | N  |
| 40 | 20 | 80 | 80 | 40 | 80 | 70 | 80 | 40 | 30 | 55 | 80 | 80 | 60 | 50 | 50 | 40 | 80 | 50 | 60 | 70 | 30 | 80 | 40 | 90 | 70 | 50 | 90 | 60 | 50 | 60 | 20 | 75 | 60 | 50 | 50 | 60 | 90 | 60 | 60 | 40 | 70 | 80 | 50 | 70 | 80 |
| 10 | 80 | 0  | 5  | 25 | 0  | 40 | 0  | 80 | 80 | 5  | 5  | 0  | 70 | 45 | 15 | 0  | 0  | 40 | 40 | 0  | 30 | 20 | 0  | 30 | 30 | 0  | 30 | 30 | 5  | 0  | 65 | 60 | 30 | 40 | 60 | 30 | 0  | 15 | 40 | 70 | 10 | 10 | 40 | 20 | 30 |

[illegible]



[illegible]

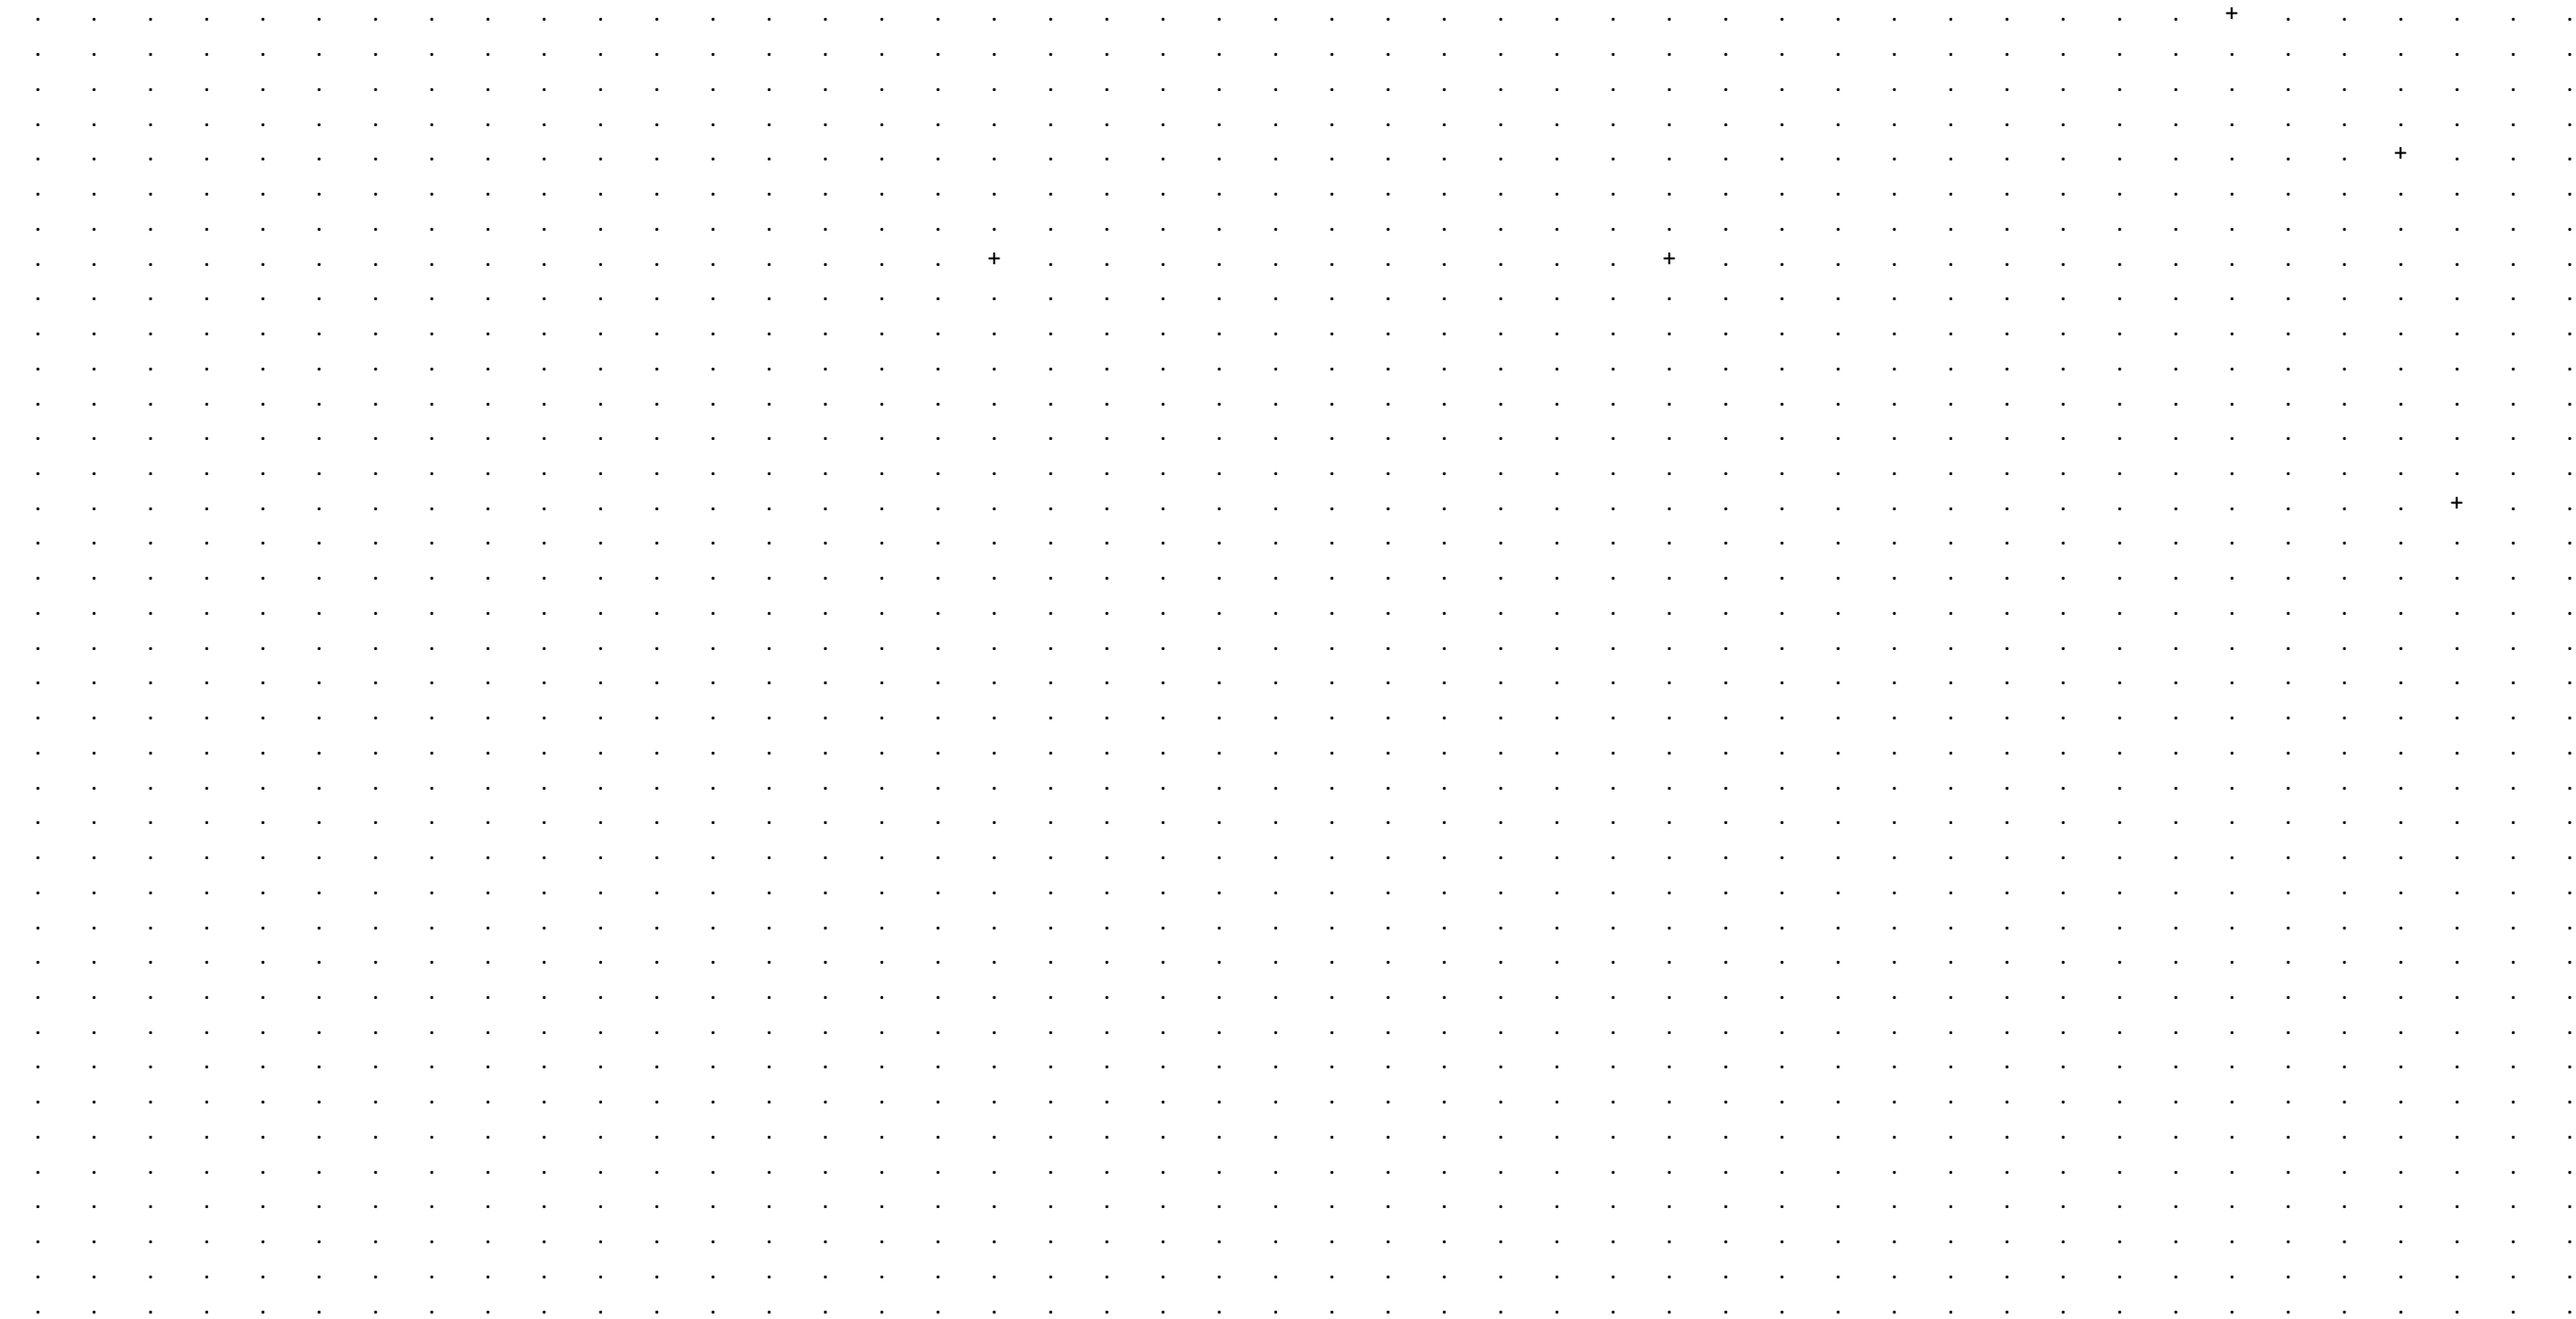

A8: 45.68847, 13.86323; A9: 45.68217, 13.86462.  
SCAP – scapose, SUFFR – suffrutescens; Chorototypes: BALK – Balkan, CEUR – Cental European, EURCAU – Eurocaucasian, EUROASI - Eurasian, MED – Mediterranean, NORTH – norhern, SEUR - SE European; Strategies: C – competitor, S – str

|    |    |    |    |    |    |    |    |    |    |    |    |    |    |    |     |     |     |     |     |     |     |     |     |     |     |     |     |     |     |     |     |     |     |     |     |     |     |     |     |     |     |     |     |     |     |
|----|----|----|----|----|----|----|----|----|----|----|----|----|----|----|-----|-----|-----|-----|-----|-----|-----|-----|-----|-----|-----|-----|-----|-----|-----|-----|-----|-----|-----|-----|-----|-----|-----|-----|-----|-----|-----|-----|-----|-----|-----|
| 85 | 86 | 87 | 88 | 89 | 90 | 91 | 92 | 93 | 94 | 95 | 96 | 97 | 98 | 99 | 100 | 101 | 102 | 103 | 104 | 105 | 106 | 107 | 108 | 109 | 110 | 111 | 112 | 113 | 114 | 115 | 116 | 117 | 118 | 119 | 120 | 121 | 122 | 123 | 124 | 125 | 126 | 127 | 128 | 129 | 130 |
| 2  | 12 | 12 | 22 | 29 | 11 | 18 | 12 | 11 | 13 | 20 | 12 | 20 | 20 | 22 | 11  | 29  | 2   | 13  | 29  | 13  | 18  | 20  | 2   | 13  | 2   | 18  | 11  | 20  | 2   | 18  | 20  | 29  | 22  | 11  | 2   | 20  | 29  | 2   | 13  | 22  | 18  | 2   | 11  | 18  | 12  |
| 6  | 6  | 6  | 5  | 5  | 6  | 5  | 6  | 6  | 5  | 5  | 6  | 5  | 5  | 5  | 6   | 5   | 6   | 5   | 5   | 5   | 5   | 6   | 5   | 6   | 5   | 6   | 5   | 6   | 5   | 5   | 5   | 6   | 6   | 5   | 5   | 6   | 5   | 5   | 5   | 5   | 6   | 6   | 5   | 6   |     |
| 20 | 20 | 20 | 20 | 20 | 20 | 20 | 20 | 20 | 20 | 20 | 20 | 20 | 20 | 20 | 20  | 20  | 20  | 20  | 20  | 20  | 20  | 20  | 20  | 20  | 20  | 20  | 20  | 20  | 20  | 20  | 20  | 20  | 20  | 20  | 20  | 20  | 20  | 20  | 20  | 20  | 20  | 20  | 20  | 20  | 20  |
| A7 | A8 | A8 | A5 | A6 | A7 | A3 | A8 | A7 | A4 | A0 | A8 | A0 | A0 | A5 | A7  | A6  | A9  | A4  | A6  | A4  | A3  | A0  | A9  | A4  | A7  | A3  | A7  | A0  | A9  | A3  | A0  | A6  | A5  | A7  | A9  | A0  | A6  | A9  | A4  | A5  | A3  | A9  | A7  | A3  | A8  |
| 22 | 30 | 10 | 8  | 24 | 16 | 18 | 18 | 14 | 32 | 18 | 12 | 22 | 20 | 16 | 18  | 18  | 12  | 30  | 20  | 28  | 10  | 12  | 20  | 16  | 16  | 14  | 10  | 20  | 16  | 12  | 14  | 22  | 10  | 8   | 10  | 16  | 20  | 22  | 22  | 6   | 12  | 24  | 12  | 8   | 8   |
| S  | S  | N  | N  | S  | N  | N  | N  | N  | N  | N  | N  | S  | S  | S  | N   | S   | S   | N   | N   | N   | S   | S   | S   | S   | S   | N   | N   | N   | S   | N   | S   | S   | S   | N   | S   | N   | S   | S   | N   | N   | S   | S   | N   | S   | N   |
| 40 | 45 | 50 | 80 | 80 | 60 | 60 | 20 | 40 | 90 | 50 | 30 | 70 | 80 | 90 | 80  | 20  | 80  | 90  | 70  | 90  | 40  | 20  | 85  | 80  | 85  | 70  | 85  | 35  | 50  | 60  | 30  | 50  | 30  | 85  | 50  | 70  | 20  | 75  | 90  | 90  | 60  | 80  | 40  | 40  | 10  |
| 70 | 75 | 20 | 25 | 20 | 30 | 0  | 90 | 60 | 0  | 40 | 60 | 30 | 10 | 0  | 20  | 30  | 5   | 15  | 30  | 0   | 40  | 80  | 10  | 0   | 10  | 5   | 0   | 60  | 60  | 20  | 70  | 40  | 60  | 0   | 30  | 30  | 80  | 20  | 0   | 20  | 30  | 0   | 60  | 40  | 80  |

[illegible]

[illegible]

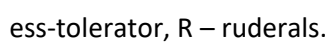

| 131 | 132 | 133 | 134 | 135 | 136 | 137 | 138 | 139 | 140 | 141 | 142 | 143 | 144 | 145 | 146 | 147 | 148 | 149 | 150 | 151 | 152 | 153 | 154 | 155 | 156 | 157 | 158 | 159 | 160 | 161 | 162 | 163 | 164 | 165 | 166 | 167 | 168 | 169 | 170 | 171 | 172 | 173 | 174 | 175 | 176 |
|-----|-----|-----|-----|-----|-----|-----|-----|-----|-----|-----|-----|-----|-----|-----|-----|-----|-----|-----|-----|-----|-----|-----|-----|-----|-----|-----|-----|-----|-----|-----|-----|-----|-----|-----|-----|-----|-----|-----|-----|-----|-----|-----|-----|-----|-----|
| 18  | 2   | 22  | 29  | 1   | 29  | 29  | 20  | 2   | 29  | 1   | 29  | 13  | 13  | 22  | 20  | 1   | 20  | 22  | 2   | 2   | 29  | 12  | 12  | 21  | 12  | 29  | 11  | 20  | 18  | 1   | 12  | 13  | 20  | 13  | 2   | 13  | 20  | 18  | 20  | 12  | 29  | 12  | 1   | 2   | 13  |
| 5   | 6   | 5   | 5   | 6   | 5   | 5   | 5   | 6   | 5   | 6   | 5   | 5   | 5   | 5   | 5   | 6   | 5   | 5   | 6   | 6   | 5   | 6   | 6   | 5   | 6   | 5   | 6   | 5   | 5   | 6   | 6   | 5   | 5   | 5   | 6   | 5   | 5   | 5   | 6   | 5   | 6   | 6   | 6   | 5   |     |
| 20  | 20  | 20  | 20  | 20  | 20  | 20  | 20  | 20  | 20  | 20  | 20  | 20  | 20  | 20  | 20  | 20  | 20  | 20  | 20  | 20  | 20  | 20  | 20  | 20  | 20  | 20  | 20  | 20  | 20  | 20  | 20  | 20  | 20  | 20  | 20  | 20  | 20  | 20  | 20  | 20  | 20  | 20  | 20  | 20  | 20  |
| A3  | A7  | A5  | A6  | A9  | A6  | A6  | A0  | A7  | A6  | A9  | A6  | A4  | A4  | A5  | A0  | A9  | A0  | A5  | A9  | A9  | A6  | A8  | A8  | A2  | A8  | A6  | A7  | A0  | A3  | A9  | A8  | A4  | A0  | A4  | A7  | A4  | A0  | A3  | A0  | A8  | A6  | A8  | A9  | A9  | A4  |
| 16  | 18  | 14  | 14  | 20  | 12  | 12  | 8   | 14  | 10  | 16  | 14  | 20  | 26  | 6   | 18  | 18  | 16  | 12  | 8   | 18  | 16  | 28  | 6   | 16  | 22  | 10  | 6   | 14  | 6   | 14  | 16  | 24  | 10  | 14  | 12  | 12  | 8   | 2   | 10  | 20  | 6   | 24  | 12  | 6   | 14  |
| N   | S   | S   | N   | N   | N   | S   | S   | S   | S   | N   | S   | N   | N   | S   | S   | N   | S   | S   | S   | S   | S   | S   | N   | N   | S   | N   | N   | N   | S   | N   | S   | N   | S   | S   | S   | S   | N   | S   | N   | S   | N   | S   | N   | S   | N   |
| 70  | 80  | 50  | 30  | 80  | 85  | 60  | 20  | 85  | 10  | 60  | 10  | 60  | 90  | 20  | 95  | 60  | 70  | 50  | 50  | 60  | 5   | 80  | 60  | 90  | 50  | 20  | 90  | 20  | 30  | 90  | 50  | 90  | 20  | 80  | 80  | 60  | 25  | 60  | 20  | 20  | 30  | 70  | 95  | 90  | 70  |
| 0   | 20  | 40  | 70  | 30  | 20  | 40  | 80  | 10  | 80  | 30  | 90  | 0   | 0   | 80  | 10  | 40  | 30  | 60  | 45  | 40  | 90  | 20  | 60  | 0   | 30  | 70  | 0   | 80  | 60  | 5   | 60  | 0   | 90  | 20  | 30  | 40  | 80  | 30  | 70  | 100 | 40  | 20  | 0   | 5   | 30  |

[illegible]





|     |     |     |     |     |     |     |     |     |     |     |     |     |     |     |     |     |     |     |     |     |     |     |     |     |     |     |     |     |     |     |     |     |     |     |     |     |     |     |     |     |     |     |     |     |     |
|-----|-----|-----|-----|-----|-----|-----|-----|-----|-----|-----|-----|-----|-----|-----|-----|-----|-----|-----|-----|-----|-----|-----|-----|-----|-----|-----|-----|-----|-----|-----|-----|-----|-----|-----|-----|-----|-----|-----|-----|-----|-----|-----|-----|-----|-----|
| 177 | 178 | 179 | 180 | 181 | 182 | 183 | 184 | 185 | 186 | 187 | 188 | 189 | 190 | 191 | 192 | 193 | 194 | 195 | 196 | 197 | 198 | 199 | 200 | 201 | 202 | 203 | 204 | 205 | 206 | 207 | 208 | 209 | 210 | 211 | 212 | 213 | 214 | 215 | 216 | 217 | 218 | 219 | 220 | 221 | 222 |
| 21  | 13  | 2   | 22  | 2   | 20  | 12  | 18  | 19  | 22  | 19  | 21  | 19  | 29  | 12  | 12  | 29  | 13  | 21  | 21  | 13  | 22  | 1   | 2   | 29  | 19  | 11  | 12  | 12  | 19  | 19  | 1   | 18  | 13  | 18  | 19  | 1   | 12  | 18  | 18  | 22  | 20  | 19  | 2   | 19  | 19  |
| 5   | 5   | 6   | 5   | 6   | 5   | 6   | 5   | 5   | 5   | 5   | 5   | 5   | 5   | 6   | 6   | 5   | 5   | 5   | 5   | 5   | 6   | 6   | 5   | 5   | 5   | 6   | 6   | 6   | 5   | 5   | 6   | 5   | 5   | 5   | 5   | 6   | 6   | 5   | 5   | 5   | 5   | 5   | 6   | 5   | 5   |
| 20  | 20  | 20  | 20  | 20  | 20  | 20  | 20  | 20  | 20  | 20  | 20  | 20  | 20  | 20  | 20  | 20  | 20  | 20  | 20  | 20  | 20  | 20  | 20  | 20  | 20  | 20  | 20  | 20  | 20  | 20  | 20  | 20  | 20  | 20  | 20  | 20  | 20  | 20  | 20  | 20  | 20  | 20  | 20  | 20  | 20  |
| A2  | A4  | A9  | A5  | A9  | A0  | A8  | A3  | A1  | A5  | A1  | A2  | A1  | A6  | A8  | A8  | A6  | A4  | A2  | A2  | A4  | A5  | A9  | A7  | A6  | A1  | A7  | A8  | A8  | A1  | A1  | A9  | A3  | A4  | A3  | A1  | A9  | A8  | A3  | A3  | A5  | A0  | A1  | A9  | A1  | A1  |
| 18  | 12  | 0   | 4   | 2   | 12  | 4   | 4   | 20  | 4   | 6   | 12  | 16  | 6   | 26  | 14  | 8   | 16  | 12  | 14  | 18  | 2   | 2   | 10  | 8   | 10  | 4   | 2   | 18  | 2   | 4   | 6   | 0   | 6   | 4   | 14  | 0   | 8   | 8   | 0   | 2   | 6   | 8   | 4   | 12  | 18  |
| N   | N   | S   | S   | S   | N   | N   | N   | N   | N   | S   | N   | N   | S   | S   | S   | S   | N   | S   | N   | N   | N   | N   | S   | N   | N   | N   | N   | S   | S   | S   | N   | S   | N   | S   | N   | N   | S   | N   | N   | S   | N   | N   | S   | N   | N   |
| 80  | 70  | 95  | 20  | 60  | 60  | 80  | 95  | 100 | 95  | 80  | 90  | 100 | 10  | 80  | 50  | 20  | 100 | 70  | 90  | 100 | 100 | 85  | 80  | 10  | 100 | 90  | 90  | 25  | 90  | 90  | 95  | 95  | 20  | 30  | 95  | 90  | 70  | 80  | 100 | 70  | 95  | 80  | 85  | 95  | 100 |
| 5   | 50  | 0   | 50  | 30  | 40  | 10  | 0   | 0   | 2   | 30  | 5   | 0   | 80  | 10  | 50  | 80  | 30  | 0   | 0   | 0   | 0   | 15  | 20  | 90  | 0   | 0   | 20  | 100 | 10  | 20  | 0   | 0   | 90  | 30  | 0   | 10  | 80  | 5   | 0   | 5   | 5   | 0   | 15  | 0   | 0   |

[illegible]



| 223 | 224 | 225 | 226 | 227 | 228 | 229 | 230 | 231 | 232 | 233 | 234 | 235 | 236 | 237 | 238 | 239 | 240 | 241 | 242 | 243 | 244 | 245 | 246 | 247 | 248 | 249 | 250 | 251 | 252 | 253 | 254 | 255 | 256 | 257 | 258 | 259 | 260 | 261 | 262 | 263 | 264 | 265 | 266 | 267 | 268 |
|-----|-----|-----|-----|-----|-----|-----|-----|-----|-----|-----|-----|-----|-----|-----|-----|-----|-----|-----|-----|-----|-----|-----|-----|-----|-----|-----|-----|-----|-----|-----|-----|-----|-----|-----|-----|-----|-----|-----|-----|-----|-----|-----|-----|-----|-----|
| 20  | 2   | 21  | 13  | 13  | 19  | 21  | 22  | 19  | 13  | 18  | 12  | 22  | 20  | 12  | 13  | 29  | 19  | 29  | 21  | 1   | 13  | 29  | 20  | 21  | 18  | 21  | 19  | 1   | 13  | 13  | 12  | 20  | 29  | 21  | 22  | 20  | 29  | 19  | 29  | 12  | 13  | 20  | 20  | 13  | 2   |
| 5   | 6   | 5   | 5   | 5   | 5   | 5   | 5   | 5   | 5   | 5   | 6   | 5   | 5   | 6   | 5   | 5   | 5   | 5   | 5   | 6   | 5   | 5   | 5   | 5   | 5   | 5   | 5   | 6   | 5   | 5   | 6   | 5   | 5   | 5   | 5   | 5   | 5   | 5   | 5   | 5   | 5   | 5   | 5   | 6   |     |
| 20  | 20  | 20  | 20  | 20  | 20  | 20  | 20  | 20  | 20  | 20  | 20  | 20  | 20  | 20  | 20  | 20  | 20  | 20  | 20  | 20  | 20  | 20  | 20  | 20  | 20  | 20  | 20  | 20  | 20  | 20  | 20  | 20  | 20  | 20  | 20  | 20  | 20  | 20  | 20  | 20  | 20  | 20  | 20  | 20  |     |
| A0  | A7  | A2  | A4  | A4  | A1  | A2  | A5  | A1  | A4  | A3  | A8  | A5  | A0  | A8  | A4  | A6  | A1  | A6  | A2  | A9  | A4  | A6  | A0  | A2  | A3  | A2  | A1  | A9  | A4  | A4  | A8  | A0  | A6  | A2  | A5  | A0  | A6  | A1  | A6  | A8  | A4  | A0  | A0  | A4  | A7  |
| 0   | 8   | 2   | 10  | 6   | 8   | 10  | 0   | 6   | 4   | 2   | 12  | 0   | 4   | 10  | 8   | 0   | 4   | 4   | 8   | 10  | 10  | 4   | 0   | 4   | 6   | 6   | 0   | 8   | 4   | 2   | 2   | 2   | 0   | 2   | 8   | 4   | 2   | 0   | 2   | 6   | 0   | 6   | 2   | 8   | 6   |
| S   | S   | N   | N   | S   | S   | S   | S   | N   | S   | N   | S   | N   | S   | S   | S   | S   | N   | S   | N   | N   | S   | N   | N   | N   | N   | N   | N   | N   | N   | S   | S   | S   | N   | S   | S   | N   | N   | S   | S   | S   | S   | S   | N   | N   | S   |
| 90  | 40  | 80  | 50  | 50  | 80  | 75  | 95  | 40  | 80  | 100 | 20  | 100 | 90  | 20  | 90  | 100 | 40  | 40  | 80  | 90  | 100 | 70  | 95  | 60  | 90  | 80  | 100 | 95  | 100 | 100 | 70  | 90  | 100 | 80  | 10  | 100 | 100 | 90  | 70  | 50  | 90  | 80  | 90  | 30  | 80  |
| 5   | 60  | 10  | 70  | 50  | 20  | 0   | 0   | 0   | 5   | 0   | 90  | 0   | 0   | 90  | 10  | 0   | 0   | 60  | 15  | 10  | 10  | 20  | 0   | 40  | 0   | 20  | 0   | 0   | 0   | 0   | 30  | 0   | 0   | 0   | 80  | 0   | 0   | 10  | 30  | 70  | 0   | 0   | 0   | 90  | 10  |

[illegible]



|     |     |     |     |     |     |     |     |     |     |     |     |     |     |     |     |     |     |
|-----|-----|-----|-----|-----|-----|-----|-----|-----|-----|-----|-----|-----|-----|-----|-----|-----|-----|
| 269 | 270 | 271 | 272 | 273 | 274 | 275 | 276 | 277 | 278 | 279 | 280 | 281 | 282 | 283 | 284 | 285 | 286 |
| 21  | 21  | 12  | 21  | 1   | 13  | 12  | 21  | 19  | 21  | 13  | 2   | 2   | 11  | 2   | 21  | 11  | 12  |
| 5   | 5   | 6   | 5   | 6   | 5   | 6   | 5   | 5   | 5   | 5   | 6   | 6   | 6   | 6   | 5   | 6   | 6   |
| 20  | 20  | 20  | 20  | 20  | 20  | 20  | 20  | 20  | 20  | 20  | 20  | 20  | 20  | 20  | 20  | 20  | 20  |
| A2  | A2  | A8  | A2  | A9  | A4  | A8  | A2  | A1  | A2  | A4  | A7  | A7  | A7  | A7  | A2  | A7  | A8  |
| 10  | 8   | 4   | 0   | 4   | 0   | 0   | 6   | 2   | 4   | 2   | 0   | 4   | 0   | 2   | 0   | 2   | 0   |
| N   | S   | S   | S   | N   | N   | S   | S   | N   | S   | N   | S   | S   | N   | S   | N   | N   | N   |
| 70  | 70  | 60  | 90  | 95  | 100 | 70  | 70  | 80  | 70  | 100 | 75  | 80  | 90  | 80  | 90  | 80  | 100 |
| 20  | 0   | 50  | 0   | 5   | 0   | 30  | 15  | 0   | 10  | 0   | 15  | 15  | 0   | 10  | 0   | 0   | 10  |

Plant traits and bioindicator values (EIV) of individual species

|   |   |   |   |   |   |   |   |   |   |   |   |   |   |   |   |   |   | Life form | Architectures | Chorotypes | Light | Temperature | Continentality | Humidity | Reaction | Nutrients | Strategy |
|---|---|---|---|---|---|---|---|---|---|---|---|---|---|---|---|---|---|-----------|---------------|------------|-------|-------------|----------------|----------|----------|-----------|----------|
| . | . | . | . | . | . | . | . | . | . | . | . | . | . | . | . | . | . | H         | SCAP          | SEUR       | 6     | N/A         | 6              | 4        | N/A      | N/A       | csr      |
| . | . | . | . | . | . | . | . | . | . | . | . | . | . | . | . | . | . | P         | SCAP          | EURCAU     | 4     | 5           | 6              | 5        | 7        | 5         | c        |
| . | . | . | . | . | . | . | . | . | . | . | . | . | . | . | . | . | . | P         | SCAP          | EURCAU     | 5     | 6           | 4              | N/A      | N/A      | N/A       | c        |
| . | . | . | . | . | . | . | . | . | . | . | . | . | . | . | . | . | . | H         | SCAP          | BALK       | 5     | 6           | 7              | 4        | 7        | 4         | N/A      |
| . | . | . | . | . | . | . | . | . | . | . | . | . | . | . | . | . | . | G         | RHIZ          | EUROASI    | 4     | 6           | 5              | 3        | 6        | 5         | c        |
| . | . | . | . | . | . | . | . | . | . | . | . | . | . | . | . | . | . | H         | SCAP          | NORTH      | 5     | N/A         | N/A            | 5        | N/A      | 5         | c        |
| . | . | . | . | . | . | . | . | . | . | . | . | . | . | . | . | . | . | G         | RHIZ          | NORTH      | N/A   | N/A         | 4              | N/A      | 5        | N/A       | csr      |
| . | . | . | . | . | . | . | . | . | . | . | . | . | . | . | . | . | . | CH        | REPT          | CEUR       | 6     | 7           | 5              | 4        | 7        | 4         | csr      |
| . | . | . | . | . | . | . | . | . | . | . | . | . | . | . | . | . | . | P         | SCAP          | EURCAU     | 4     | 6           | 4              | N/A      | N/A      | N/A       | c        |
| . | . | . | . | . | . | . | . | . | . | . | . | . | . | . | . | . | . | G         | RHIZ          | NORTH      | 3     | N/A         | 6              | N/A      | 3        | 3         | s        |
| . | . | . | . | . | . | . | . | . | . | . | . | . | . | . | . | . | . | H         | SCAP          | NORTH      | 7     | 6           | 5              | N/A      | 8        | 5         | c        |
| . | . | . | . | . | . | . | . | . | . | . | . | . | . | . | . | . | . | H         | SCAP          | EUROASI    | 7     | 5           | N/A            | 6        | 7        | 6         | c        |
| . | . | . | . | . | . | . | . | . | . | . | . | . | . | . | . | . | . | G         | RHIZ          | EURCAU     | 3     | 5           | 4              | 5        | 7        | 6         | csr      |
| . | . | . | . | . | . | . | . | . | . | . | . | . | . | . | . | . | . | H         | SCAP          | SEUR       | 4     | 5           | 4              | 6        | 7        | 7         | cs       |
| . | . | . | . | . | . | . | . | . | . | . | . | . | . | . | . | . | . | T         | SCAP          | EUROASI    | 4     | 5           | 5              | 5        | 6        | 7         | csr      |
| . | . | . | . | . | . | . | . | . | . | . | . | . | . | . | . | . | . | G         | RHIZ          | EUROASI    | 4     | 4           | 5              | 4        | 7        | N/A       | csr      |
| . | . | . | . | . | . | . | . | . | . | . | . | . | . | . | . | . | . | P         | CAESP         | EURCAU     | 6     | 5           | 4              | 5        | 5        | 8         | c        |
| . | . | . | . | . | . | . | . | . | . | . | . | . | . | . | . | . | . | H         | ROS           | EURCAU     | 6     | 5           | 4              | 5        | 7        | 5         | csr      |
| . | . | . | . | . | . | . | . | . | . | . | . | . | . | . | . | . | . | G         | RHIZ          | BALK       | 4     | 4           | 6              | 5        | 7        | 7         | csr      |
| . | . | . | . | . | . | . | . | . | . | . | . | . | . | . | . | . | . | G         | BULB          | EURCAU     | 5     | 7           | 4              | N/A      | 7        | 7         | csr      |
| . | . | . | . | . | . | . | . | . | . | . | . | . | . | . | . | . | . | CH        | REPT          | NORTH      | 3     | 5           | 5              | 6        | 8        | 6         | csr      |
| . | . | . | . | . | . | . | . | . | . | . | . | . | . | . | . | . | . | H         | SCAP          | EUROASI    | 4     | 5           | 5              | 5        | 8        | 8         | cs       |
| . | . | . | . | . | . | . | . | . | . | . | . | . | . | . | . | . | . | P         | CAESP         | EURCAU     | 4     | 5           | 4              | N/A      | N/A      | 5         | c        |
| . | . | . | . | . | . | . | . | . | . | . | . | . | . | . | . | . | . | G         | RHIZ          | NORTH      | 5     | N/A         | 4              | 4        | N/A      | 4         | cs       |
| . | . | . | . | . | . | . | . | . | . | . | . | . | . | . | . | . | . | H         | SCAP          | NORTH      | 4     | 5           | 4              | 5        | 7        | 6         | csr      |
| . | . | . | . | . | . | . | . | . | . | . | . | . | . | . | . | . | . | CH        | SCAP          | NORTH      | 4     | N/A         | 4              | 5        | 5        | N/A       | csr      |
| . | . | . | . | . | . | . | . | . | . | . | . | . | . | . | . | . | . | P         | SCAP          | EUROASI    | 6     | 6           | 5              | 5        | 4        | 6         | c        |
| . | . | . | . | . | . | . | . | . | . | . | . | . | . | . | . | . | . | H         | CAESP         | EUROASI    | 3     | 5           | 5              | 4        | N/A      | 3         | csr      |
| . | . | . | . | . | . | . | . | . | . | . | . | . | . | . | . | . | . | H         | SCAP          | SEUR       | 5     | 4           | 5              | 7        | 8        | 0         | N/A      |
| . | . | . | . | . | . | . | . | . | . | . | . | . | . | . | . | . | . | H         | SCAP          | EURCAU     | 2     | 4           | 5              | 5        | 7        | 5         | cs       |
| . | . | . | . | . | . | . | . | . | . | . | . | . | . | . | . | . | . | H         | SCAP          | CEUR       | 5     | 4           | 5              | 6        | 6        | 5         | N/A      |
| . | . | . | . | . | . | . | . | . | . | . | . | . | . | . | . | . | . | H         | SCAP          | NORTH      | 4     | 5           | 4              | 4        | 8        | N/A       | csr      |
| . | . | . | . | . | . | . | . | . | . | . | . | . | . | . | . | . | . | G         | RHIZ          | EUROASI    | 2     | 5           | 5              | 5        | 7        | 4         | csr      |
| . | . | . | . | . | . | . | . | . | . | . | . | . | . | . | . | . | . | G         | RHIZ          | BALK       | 4     | 5           | 6              | 6        | 7        | 5         | csr      |
| . | . | . | . | . | . | . | . | . | . | . | . | . | . | . | . | . | . | G         | RHIZ          | NORTH      | 4     | 6           | 4              | 4        | 7        | N/A       | csr      |
| . | . | . | . | . | . | . | . | . | . | . | . | . | . | . | . | . | . | H         | SCAP          | EURCAU     | 4     | 5           | 4              | 5        | N/A      | 6         | csr      |

|   |   |   |   |   |   |   |   |   |   |   |   |   |   |   |   |   |    |       |         |     |     |     |     |     |     |     |
|---|---|---|---|---|---|---|---|---|---|---|---|---|---|---|---|---|----|-------|---------|-----|-----|-----|-----|-----|-----|-----|
| . | . | . | . | . | . | . | . | . | . | . | . | . | . | . | . | . | H  | SCAP  | EUROASI | 5   | 5   | 5   | 4   | 8   | 3   | csr |
| . | . | . | . | . | . | . | . | . | . | . | . | . | . | . | . | . | G  | RHIZ  | EURCAU  | 2   | 5   | 4   | N/A | 7   | 7   | cs  |
| . | . | . | . | . | . | . | . | . | . | . | . | . | . | . | . | . | P  | CAESP | EUROASI | 6   | 7   | 5   | 4   | 6   | 3   | c   |
| . | . | . | . | . | . | . | . | . | . | . | . | . | . | . | . | . | P  | LIAN  | EURCAU  | 7   | 7   | 4   | 5   | 7   | 7   | c   |
| . | . | . | . | . | . | . | . | . | . | . | . | . | . | . | . | . | H  | SCAP  | EURCAU  | 5   | 6   | 4   | 4   | 4   | 2   | c   |
| . | . | . | . | . | . | . | . | . | . | . | . | . | . | . | . | . | G  | RHIZ  | EUROASI | 2   | 5   | 5   | 5   | 7   | 5   | N/A |
| . | . | . | . | . | . | . | . | . | . | . | . | . | . | . | . | . | H  | SCAP  | EURCAU  | 6   | 6   | 4   | 4   | 8   | 4   | csr |
| . | . | . | . | . | . | . | . | . | . | . | . | . | . | . | . | . | G  | RHIZ  | BALK    | N/A | N/A | N/A | N/A | N/A | N/A | cs  |
| . | . | . | . | . | . | . | . | . | + | . | . | . | . | . | . | . | P  | SCAP  | EURCAU  | 5   | 7   | 4   | 5   | 7   | 6   | c   |
| . | . | . | . | . | . | . | . | . | . | . | . | . | . | . | . | . | H  | CAESP | EURCAU  | 4   | N/A | 4   | 4   | 7   | 3   | cs  |
| . | . | . | . | . | + | . | . | . | . | . | . | . | . | . | . | . | G  | RHIZ  | SEUR    | 4   | 6   | 6   | 4   | 7   | 5   | cs  |
| . | . | . | . | . | . | . | . | . | . | . | . | + | . | + | . | . | G  | RHIZ  | BALK    | N/A |
| . | . | . | . | . | . | . | . | . | . | . | . | . | . | . | . | . | H  | SCAP  | CEUR    | 6   | 6   | 4   | 7   | 6   | 5   | c   |
| . | . | . | . | . | . | . | . | . | . | . | . | . | . | . | . | . | CH | REPT  | EURCAU  | 6   | N/A | 4   | 6   | N/A | 6   | csr |
| . | . | + | . | + | . | . | . | . | . | . | . | . | . | . | . | . | G  | RHIZ  | EURCAU  | 5   | 6   | 5   | 3   | 4   | 5   | c   |
| . | . | . | . | . | . | . | . | . | . | . | . | . | . | . | . | . | P  | CAESP | EUROASI | 6   | 5   | 5   | 4   | 7   | 3   | c   |
| + | + | . | . | . | . | . | + | . | 1 | . | + | + | . | . | . | . | P  | LIAN  | MED     | 4   | 5   | 4   | 5   | N/A | N/A | cs  |
| 2 | 1 | + | 1 | . | + | 2 | 2 | 1 | 2 | + | + | + | 1 | . | 2 | . | P  | SCAP  | SEUR    | 5   | 8   | 6   | 3   | 8   | 3   | c   |
| . | . | . | . | . | . | . | . | . | . | . | . | . | . | . | . | . | H  | ROS   | N/A     | 5   | N/A | 5   | 5   | N/A | 4   | N/A |
| 1 | 2 | . | 1 | + | . | . | 2 | + | 1 | . | + | . | . | + | + | . | P  | SCAP  | MED     | 6   | 8   | 5   | 4   | 4   | 4   | c   |
| . | . | . | . | . | . | . | . | . | . | . | . | . | . | . | . | . | H  | CAESP | CEUR    | 5   | 3   | 4   | 7   | 9   | 2   | csr |
| . | . | . | . | . | + | . | . | . | . | . | . | . | . | . | . | . | G  | RHIZ  | BALK    | 6   | 7   | 6   | 4   | 6   | 5   | csr |
| . | . | . | . | . | . | . | . | . | . | . | . | . | . | . | . | . | P  | CAESP | EUROASI | 6   | 5   | 5   | 5   | 8   | 5   | N/A |
| . | . | . | . | . | . | . | . | . | . | . | . | . | . | . | . | . | P  | SCAP  | MED     | 4   | 7   | 5   | 3   | 8   | 3   | c   |
| . | . | . | . | . | . | . | . | . | . | . | . | . | . | . | . | . | P  | CAESP | SEUR    | 6   | 7   | 6   | 5   | 8   | 4   | c   |
| 3 | 4 | 2 | 4 | 4 | 5 | 4 | 3 | 3 | 3 | 4 | 2 | 3 | 2 | 3 | 2 | 3 | H  | CAESP | BALK    | 3   | 5   | 6   | 5   | 6   | 7   | N/A |
| . | . | . | . | . | . | . | . | . | . | . | . | . | . | . | . | . | G  | BULB  | MED     | 10  | 8   | 5   | 3   | 4   | 2   | N/A |
| . | . | . | . | . | + | . | . | . | . | . | + | + | + | + | . | . | H  | SCAP  | CEUR    | 5   | 6   | 5   | 4   | 7   | 3   | c   |
| . | . | . | . | . | . | . | . | . | . | . | . | . | . | . | . | . | G  | BULB  | EUROASI | 9   | 7   | 4   | 3   | 6   | 3   | csr |
| . | . | . | . | . | . | . | . | . | . | . | . | . | . | . | . | . | H  | SCAP  | EUROASI | 7   | 6   | 5   | 3   | N/A | 3   | csr |
| . | . | . | . | . | + | + | . | . | 1 | . | + | + | . | + | . | . | P  | CAESP | MED     | 6   | 8   | 5   | 3   | 8   | 4   | c   |
| . | . | . | . | . | . | . | . | . | . | . | . | . | . | . | . | . | H  | SCAP  | MED     | 9   | 7   | 7   | 3   | 8   | 3   | N/A |
| . | . | . | . | . | . | . | . | . | . | . | . | . | . | . | . | . | G  | RHIZ  | EURCAU  | 5   | 7   | 4   | 3   | N/A | 3   | csr |
| . | . | . | . | . | + | . | . | . | . | . | + | . | . | . | . | . | G  | RHIZ  | EUROASI | 4   | 5   | 5   | 3   | 8   | 3   | csr |
| . | . | . | . | + | . | . | + | . | . | . | . | . | . | . | . | . | P  | CAESP | MED     | 4   | 8   | 4   | 4   | N/A | N/A | N/A |
| . | . | . | . | . | . | + | . | . | . | . | . | . | . | + | . | + | G  | RHIZ  | SEUR    | 6   | 7   | 6   | 4   | 6   | 5   | csr |
| . | . | . | . | . | + | . | . | . | . | . | . | . | . | . | . | . | H  | SCAP  | EURCAU  | 6   | 6   | 4   | 3   | N/A | 2   | cs  |
| . | . | . | . | . | . | . | + | . | . | . | . | . | . | . | . | . | H  | CAESP | EUROASI | 7   | 6   | 5   | 4   | 5   | 6   | c   |
| . | + | + | . | + | . | . | . | . | + | + | 1 | 2 | 2 | 2 | + | 2 | H  | SCAP  | EUROASI | 6   | 5   | 5   | 3   | 7   | 3   | cs  |
| . | . | . | . | . | . | . | . | . | . | . | . | . | . | . | . | . | G  | BULB  | CEUR    | 6   | 4   | 4   | 6   | N/A | N/A | csr |
| . | . | . | . | . | . | + | . | . | . | . | + | . | . | . | . | . | NP | N/A   | MED     | 7   | 6   | 7   | 3   | 7   | 2   | N/A |
| . | . | . | . | . | . | . | . | . | . | . | . | . | . | . | . | . | H  | ROS   | NORTH   | 8   | N/A | 4   | 3   | 8   | 2   | N/A |
| . | . | . | . | . | . | . | . | . | . | . | . | . | . | . | . | . | H  | ROS   | MED     | 11  | 8   | 4   | 2   | 7   | 1   | N/A |
| . | . | . | . | . | . | . | . | . | . | . | . | . | . | . | . | . | T  | SCAP  | N/A     | 4   | 6   | 5   | 4   | 5   | 5   | csr |
| . | . | + | . | . | . | + | . | . | . | . | + | + | . | . | . | . | G  | RHIZ  | NORTH   | 7   | 5   | 5   | 3   | 7   | 3   | csr |
| . | . | . | + | . | . | . | . | . | . | . | . | . | . | . | . | . | NP | N/A   | EUROASI | 8   | 5   | 5   | 4   | N/A | N/A | c   |
| . | . | + | . | . | . | . | . | . | . | . | . | . | . | . | . | . | NP | N/A   | EUROASI | N/A | N/A | N/A | N/A | N/A | N/A | c   |
| . | . | . | . | . | . | . | . | . | . | . | . | . | . | . | . | . | H  | SCAP  | CEUR    | 8   | 7   | 7   | 4   | 7   | 3   | csr |
| + | . | . | . | . | . | . | . | . | . | . | . | . | . | + | . | . | H  | SCAP  | BALK    | 5   | 7   | 7   | 4   | 7   | 3   | N/A |
| . | . | . | . | . | + | . | . | + | . | . | . | . | . | . | . | . | H  | ROS   | EUROASI | 6   | 5   | 5   | 3   | 8   | 2   | csr |



|   |   |   |   |   |   |   |   |   |   |   |   |   |   |   |   |   |   |    |       |         |   |     |     |     |     |     |     |
|---|---|---|---|---|---|---|---|---|---|---|---|---|---|---|---|---|---|----|-------|---------|---|-----|-----|-----|-----|-----|-----|
| . | . | . | . | + | + | . | . | + | . | . | . | . | . | + | . | . | . | P  | SCAP  | BALK    | 7 | 8   | 6   | 3   | 7   | 4   | c   |
| . | + | 3 | + | 1 | . | 2 | + | 2 | 1 | 2 | 1 | + | 2 | + | + | 1 | 3 | H  | CAESP | EUROASI | 8 | 6   | 4   | 5   | 8   | 4   | cs  |
| . | . | + | . | . | . | . | . | . | . | . | 2 | . | . | + | . | . | . | P  | CAESP | EURCAU  | 7 | 5   | 5   | N/A | N/A | N/A | c   |
| . | . | 1 | . | . | . | . | . | . | . | + | . | . | . | . | . | . | . | P  | CAESP | SEUR    | 7 | 5   | 6   | 3   | 8   | 2   | c   |
| . | . | + | . | . | . | 1 | . | . | . | . | + | + | . | + | . | . | . | CH | SUFFR | SEUR    | 5 | 6   | 7   | 3   | 7   | 2   | cs  |
| . | . | . | . | . | . | . | . | . | . | . | . | . | . | . | . | . | . | P  | CAESP | EURCAU  | 5 | 7   | 5   | N/A | 8   | N/A | c   |
| . | . | . | . | . | . | + | . | 1 | . | . | 3 | 2 | 2 | 3 | . | 3 | . | NP | N/A   | SEUR    | 7 | 6   | 7   | 3   | 7   | 2   | c   |
| . | . | . | . | . | + | . | . | + | . | + | + | + | . | + | . | . | . | H  | CAESP | EURCAU  | 5 | 5   | 4   | 4   | 5   | 3   | csr |
| . | . | . | . | . | . | . | . | . | . | + | . | . | . | . | . | . | . | H  | SCAP  | EUROASI | 6 | N/A | 7   | 3   | 8   | 3   | cs  |
| . | . | . | . | + | . | . | . | . | . | + | . | . | . | . | . | . | . | G  | RHIZ  | EUROASI | 6 | 5   | 4   | 4   | 7   | 4   | csr |
| . | . | . | . | . | . | . | . | + | . | . | 2 | . | 1 | . | . | . | . | P  | CAESP | NORTH   | 8 | 0   | 0   | 4   | 0   | 4   | c   |
| . | + | . | . | . | . | . | + | . | . | . | . | . | . | . | . | . | . | G  | BULB  | EUROASI | 5 | 6   | 5   | 6   | 5   | 5   | csr |
| . | . | . | . | . | . | . | . | . | . | . | . | . | . | . | . | . | . | H  | CAESP | CEUR    | 9 | N/A | 5   | 2   | 7   | 2   | csr |
| . | . | . | . | 2 | . | . | . | . | . | . | . | . | . | . | . | . | . | H  | SCAP  | EUROASI | 8 | 6   | 6   | 3   | 8   | 4   | c   |
| . | . | . | + | . | + | . | . | . | 1 | . | 1 | + | 1 | 1 | 2 | . | 1 | H  | CAESP | EUROASI | 8 | 5   | 7   | 3   | 8   | 3   | cs  |
| + | . | . | . | . | . | . | . | . | . | . | . | . | . | . | . | . | . | G  | RHIZ  | NORTH   | 7 | 6   | 5   | 4   | 7   | 3   | c   |
| . | . | . | . | . | . | . | . | . | . | . | . | . | . | . | + | . | . | CH | SUFFR | EUROASI | 5 | 6   | 5   | 5   | 3   | 3   | cs  |
| . | . | . | . | . | . | . | . | . | . | . | . | . | . | . | . | . | . | H  | CAESP | MED     | 8 | 7   | 5   | 2   | 7   | 2   | cs  |
| . | . | . | . | . | . | . | . | . | . | . | . | . | . | . | . | . | . | H  | SCAP  | BALK    | 7 | 6   | 7   | 6   | 7   | 2   | N/A |
| . | . | . | + | . | . | . | . | . | . | . | . | . | . | . | . | . | . | G  | BULB  | MED     | 7 | 7   | 5   | 2   | 6   | 2   | N/A |
| . | . | . | . | . | . | . | . | . | . | . | . | . | . | . | . | . | . | H  | SCAP  | NORTH   | 8 | N/A | N/A | 4   | N/A | 5   | c   |
| . | + | . | . | . | . | . | . | . | . | . | . | . | . | . | . | . | . | H  | SCAP  | EUROASI | 7 | N/A | N/A | 5   | N/A | N/A | c   |
| . | . | . | . | + | . | . | + | . | . | . | . | . | . | . | . | . | . | H  | SCAP  | EURCAU  | 7 | 5   | 4   | 3   | 6   | 3   | csr |
| . | . | . | . | + | . | . | . | . | . | . | . | . | . | . | + | . | + | H  | SCAP  | MED     | 6 | 5   | 4   | 6   | 4   | 3   | c   |
| . | . | . | . | . | . | . | . | . | . | . | . | . | . | . | + | . | . | H  | SCAP  | CEUR    | 7 | 7   | 5   | 3   | 5   | 5   | csr |
| + | . | . | . | . | . | . | . | 1 | + | . | 1 | + | 2 | + | . | + | . | H  | CAESP | EUROASI | 7 | 5   | 5   | 3   | 8   | 3   | csr |
| + | + | . | . | . | . | . | + | . | + | . | . | . | . | . | . | . | . | H  | REPT  | EURCAU  | 7 | 5   | 6   | 4   | 4   | 4   | c   |
| . | . | . | . | . | . | . | . | . | . | + | . | . | . | . | + | . | . | H  | CAESP | EURCAU  | 5 | 5   | 4   | 4   | 5   | 4   | c   |
| . | . | . | . | . | . | . | . | . | . | . | + | 2 | + | 2 | + | + | 1 | CH | SUFFR | MED     | 7 | 6   | 5   | 2   | 8   | 1   | csr |
| . | . | . | . | . | . | . | + | . | . | . | . | . | . | . | . | . | . | G  | RHIZ  | EUROASI | 3 | 5   | 5   | 5   | 7   | 5   | csr |
| . | . | . | . | . | . | . | . | . | . | . | . | . | . | . | . | + | . | P  | CAESP | SEUR    | 7 | 5   | 5   | 4   | 8   | N/A | c   |
| . | . | . | . | . | + | . | . | . | + | . | 1 | + | + | + | . | . | . | H  | ROS   | EUROASI | 7 | 5   | 5   | 3   | 7   | 3   | csr |
| . | . | . | . | . | . | . | . | . | . | . | + | . | + | . | . | . | + | H  | SCAP  | MED     | 8 | 8   | 5   | 3   | N/A | 2   | c   |
| . | . | . | . | . | . | . | . | . | . | . | . | + | . | + | . | . | . | G  | BULB  | EUROASI | 9 | 8   | 5   | 3   | 8   | 2   | csr |
| . | . | . | . | . | . | . | . | + | . | . | . | . | . | . | + | . | . | H  | SCAP  | EUROASI | 8 | 5   | 5   | 4   | N/A | 2   | csr |
| . | . | . | . | . | . | . | . | . | . | . | . | + | . | . | + | . | . | H  | CAESP | EUROASI | 3 | 5   | 5   | 5   | 6   | N/A | c   |
| . | . | . | . | . | . | . | . | . | . | . | . | . | . | . | + | . | . | CH | SUFFR | CEUR    | 8 | 5   | 4   | 4   | 4   | 2   | cs  |
| . | . | . | . | . | . | . | . | . | . | . | . | . | . | . | . | . | + | CH | SUFFR | MED     | 7 | 7   | 6   | 3   | 3   | 2   | N/A |
